# Supplementary material
Source: publisher figshare collection journal article supplement (https://frontiersin.figshare.com/ndownloader/files/27755664)
Supplement: Supplementary file [file 27755664]

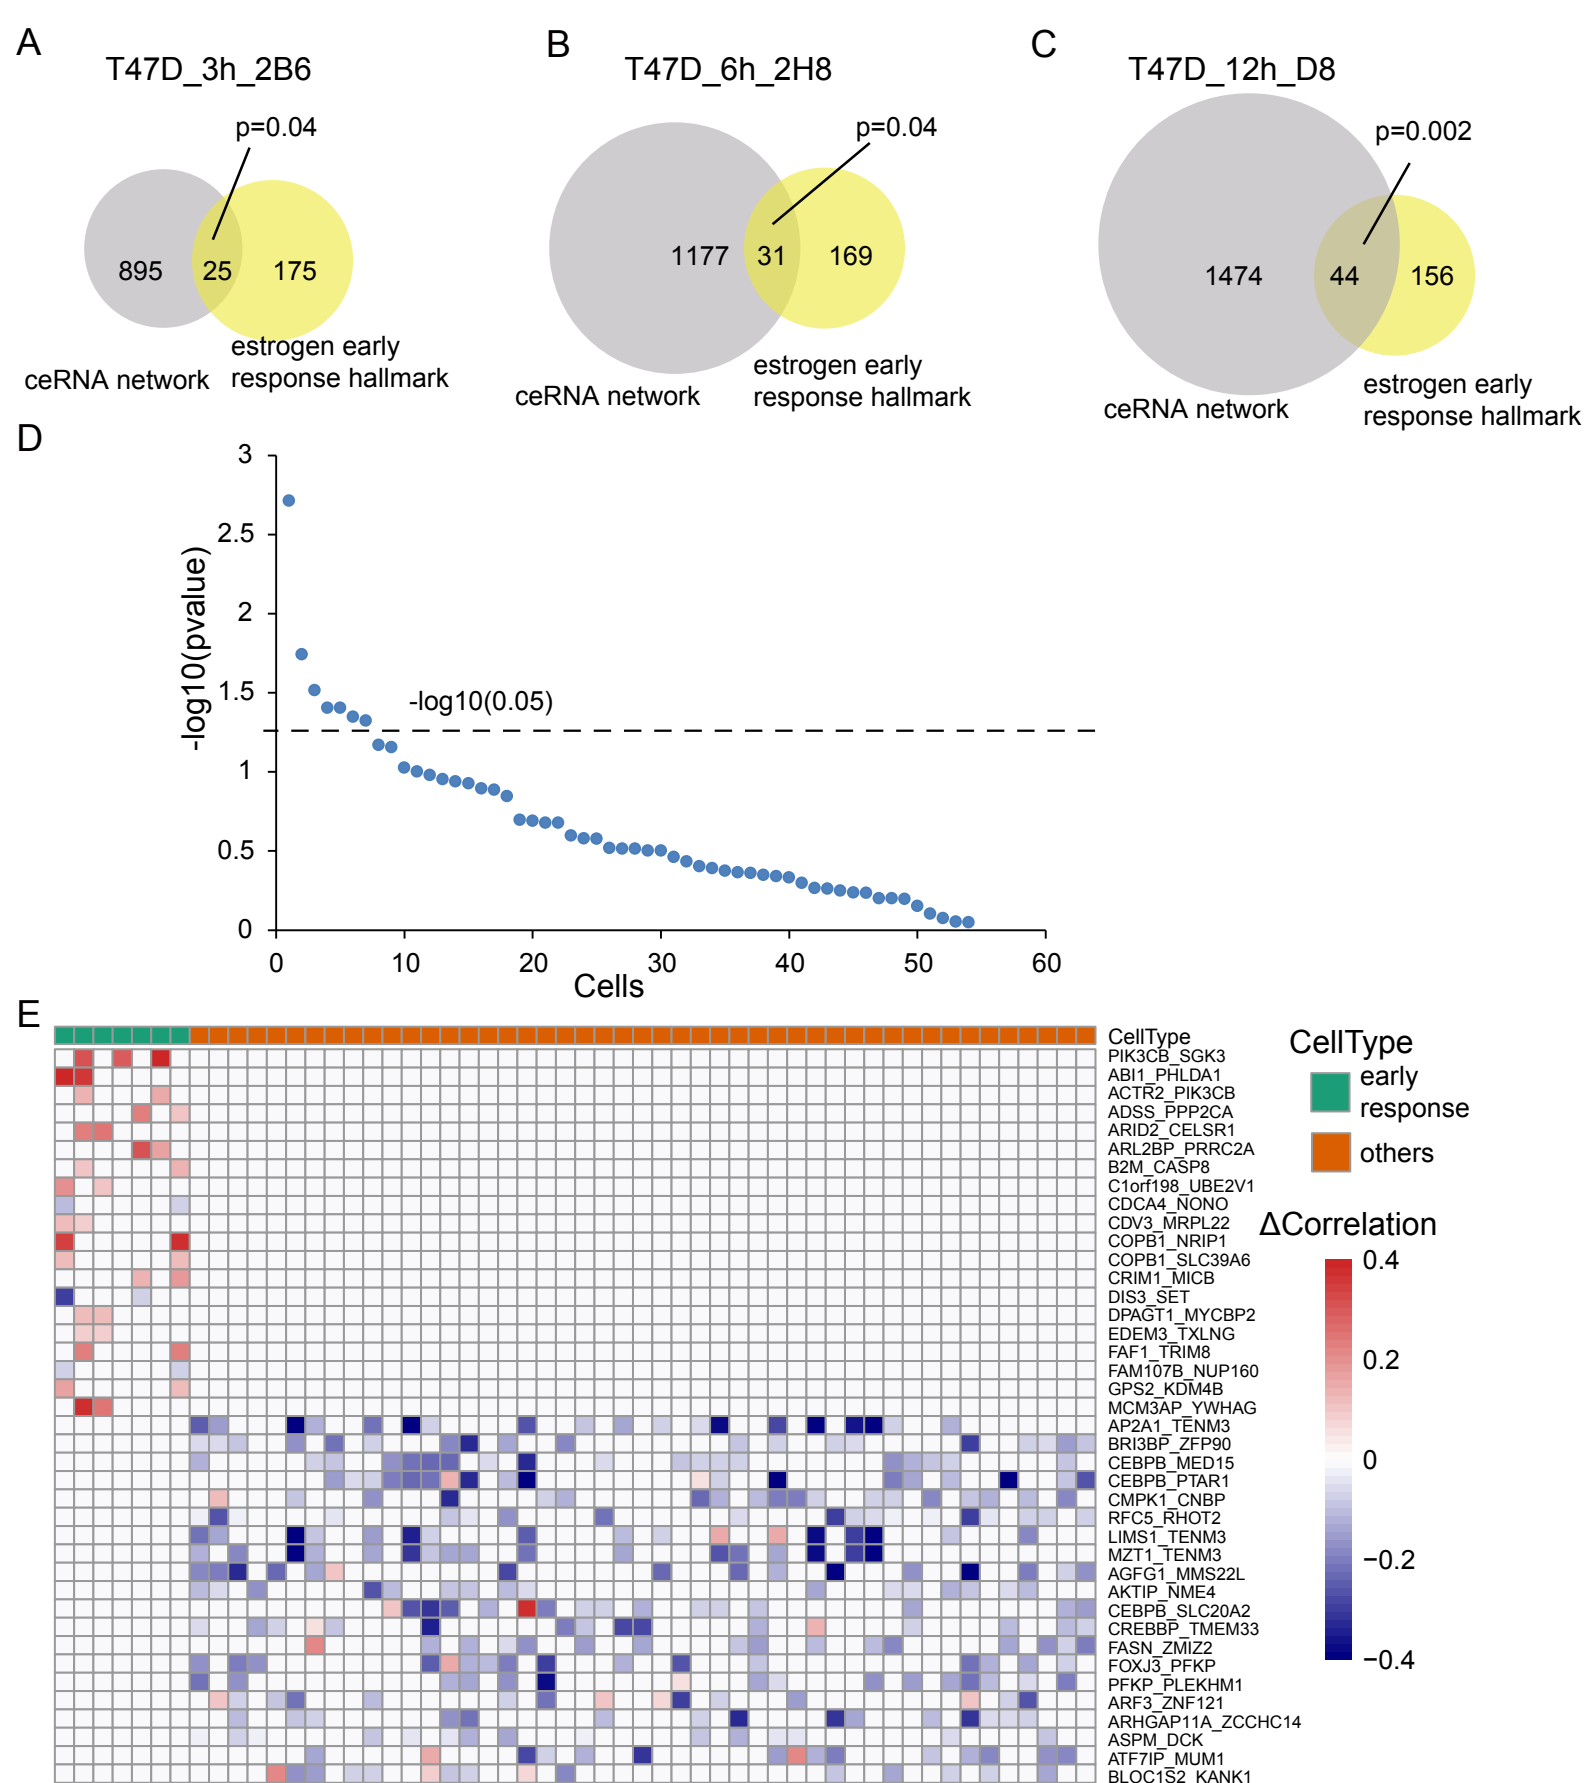

**Figure S3.** Cell subtypes inferred by the CCN of T47D cells. The RNAs in the CCN were enriched into estrogen early response hallmark, as determined by a hypergeometric test. We showed significant enrichment of RNAs in the CCN of the (A) T47D\_3h\_2B6, (B) T47D\_6h\_2H8, and (C) T47D\_12h\_D8 cells to the early response hallmarks. (D) The minus log<sub>10</sub> transformed p-value calculated by a hypergeometric test for all cells at 3 h, 6 h and 12 h. The dashed line represents the significance threshold,  $p = 0.05$ . (E) The heatmap of differential correlation in all cells that were classified into two subtypes: early-response cells vs. others. Blue represents loss of correlation in the “Perturbed network”, while red refers to the gain of correlation in the “Perturbed network”.
